# Supplementary material
Source: PubMed Central journal article supplement (PMC2919073)

**Supplementary data S2**

Screenshots of the region with a CDX2 ChIP-seq peak for each of the genes chosen for further *in vitro* analysis in this study. The CDX2 ChIP-seq results are aligned to the human genome and visualized with the UCSC genome browser: <http://genome.ucsc.edu/cgi-bin/hgTracks>. At the top is indicated the scale and the position on the chromosome. Underneath are the tags from the CDX2 and HA ChIP-seq analysis, each tag is indicated by a black bar. The red circles indicate the CDX2 ChIP-seq peaks. The lower part of the figure visualizes the exon/intron distribution of the gene, conserved transcription factor binding sites, and the phylogenetic conservation.

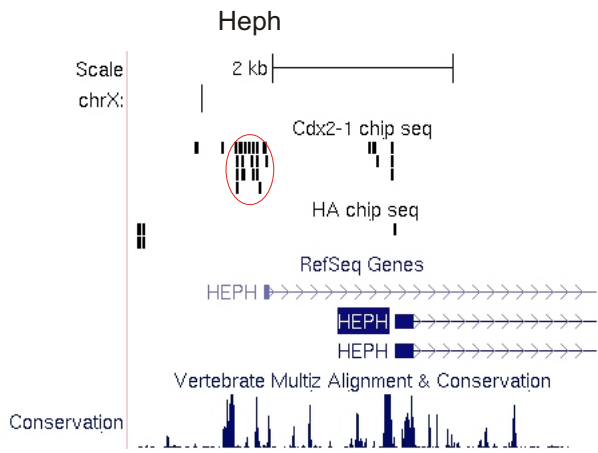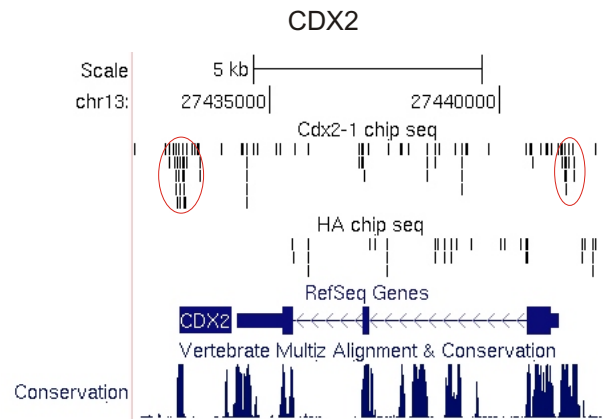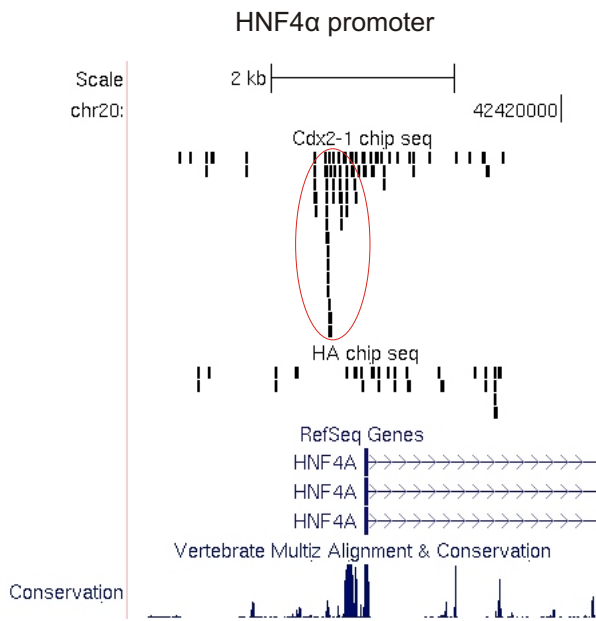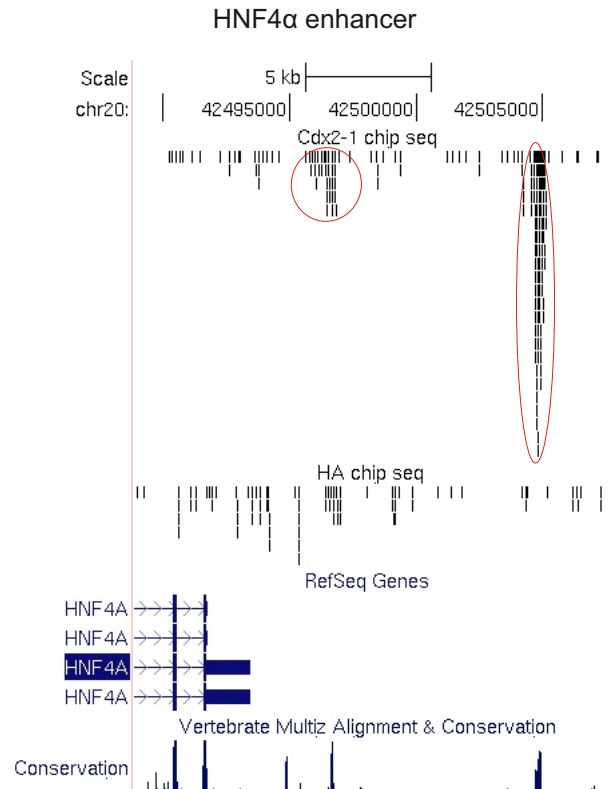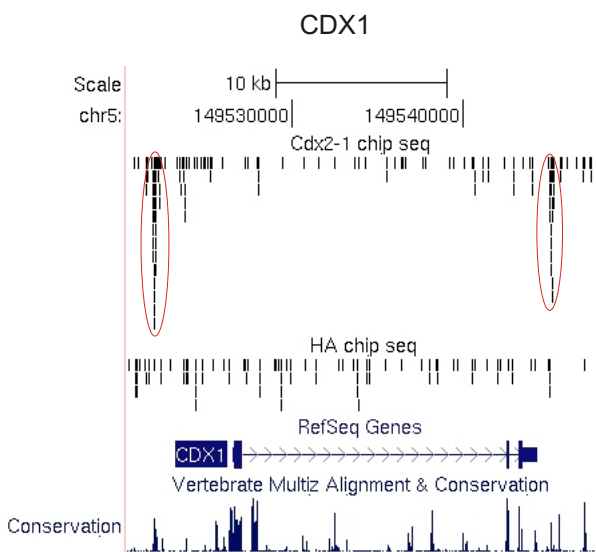

### HNF1 $\beta$

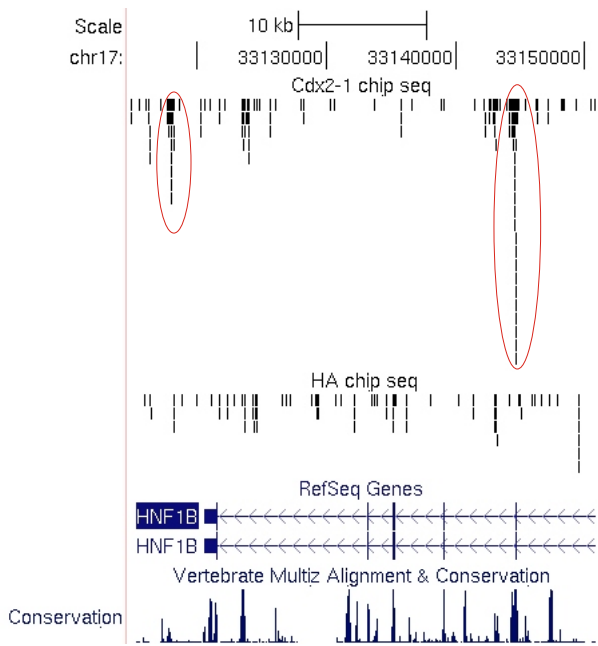

### ETS1

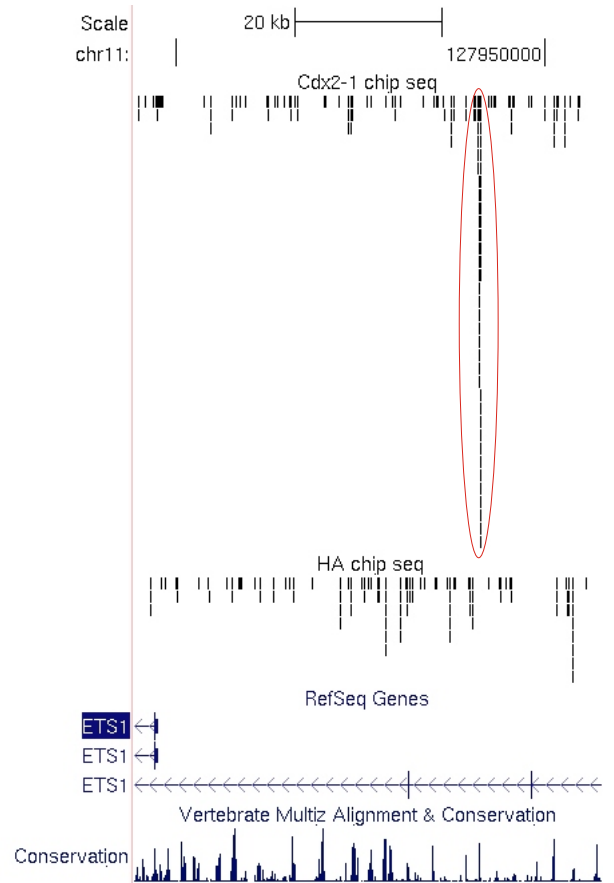

### TCF7L2

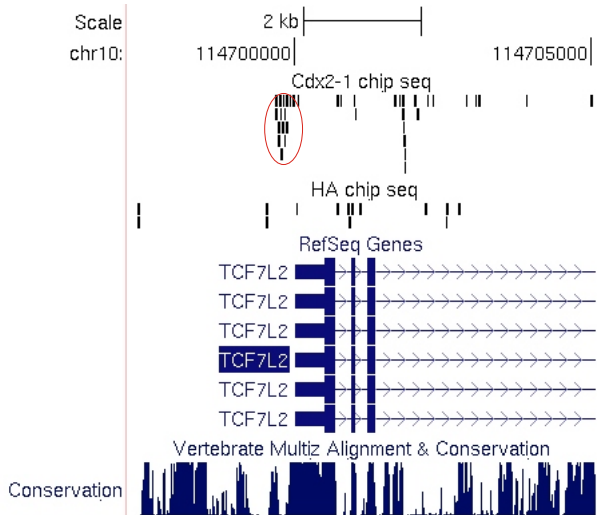

### HBP1

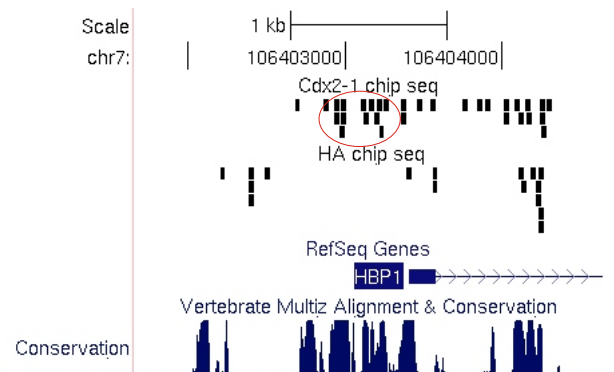

### Axin2

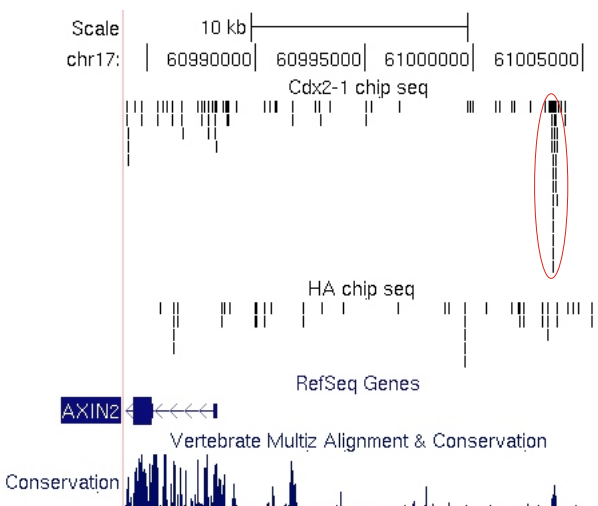

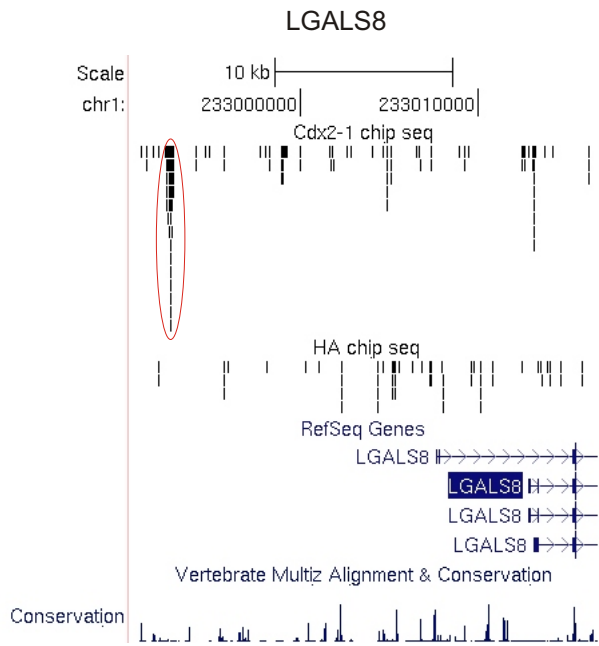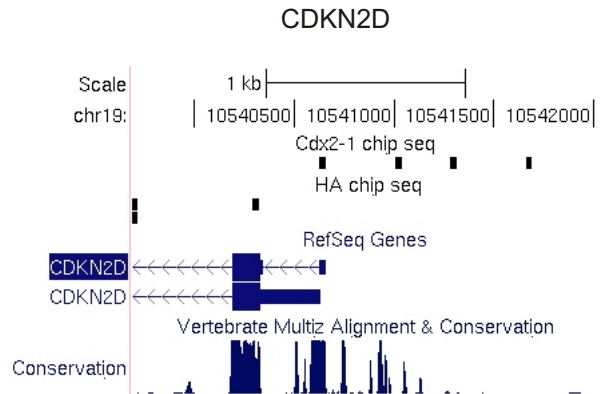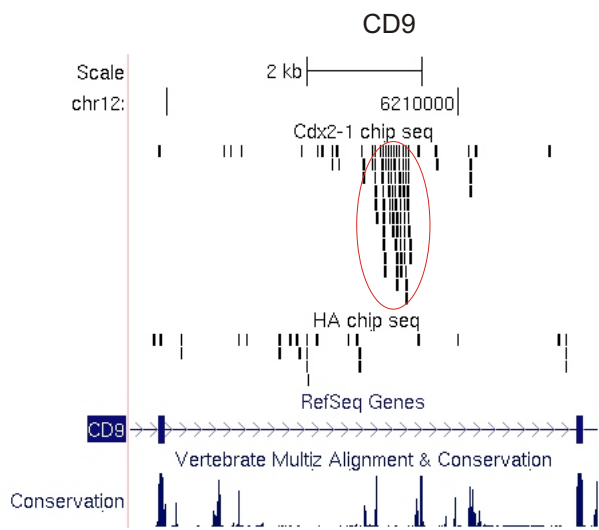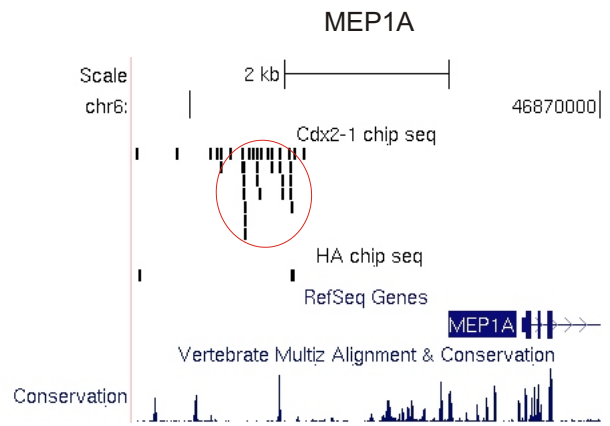

Supplement: supp_M109.089516_jbc.M109.089516-2.pdf [file supp_M109.089516_jbc.M109.089516-2.pdf]
