# Supplementary material
Source: PubMed Central journal article supplement (PMC2919073)
Supplement: supp_M109.089516_jbc.M109.089516-1.pdf [file supp_M109.089516_jbc.M109.089516-1.pdf]

**Supplementary data S1.**

The complete list of oligonucleotides used in this study.

**Primers used in ChIP qPCR**

| Refseq (Gene)                                   | Sense primer (5'-3' direction) | Antisense primer (5'-3' direction) |
|-------------------------------------------------|--------------------------------|------------------------------------|
| NM_004655<br>Axin2 5'end<br>-15456 to -15326    | CGTAGACCCTTGCAGACTGG           | AGACAGTGCCGCTCTTTTGT               |
| NM_001804<br>Cdx1 5'end<br>-4670 to -4539       | GTGCCACCAGCTTCTCTTA            | CAGAGCTGATGGCCTCATAA               |
| NM_001804<br>Cdx1 3'end<br>+18543 to +18648     | GCAGGCTGTGCACACTTTT            | CTACTACCCGGGGCCTTCT                |
| NM_201545<br>LGALS8 5'end<br>-14776 to -14908   | ACTTCCTCTTTCCGGAGGTC           | GGACAGAGACTAGCCCTTGG               |
| NM_002467<br>MYC 5'end<br>-1920 to -2049        | GCTGGAAACCTTGCACCTC            | CGTTCAGGTTTGCGAAAGTA               |
| NM_003110<br>SP2 5'end<br>-11843 to -11989      | CTATGGAGCCCAACAGAGGA           | CTGAAGTGCCTTGCAGCTC                |
| NM_000458<br>HNF1B intron<br>+34717 to 34587    | TCTGGACAGCCCTCATTTTC           | GTGAGTACACCTGGGCCATT               |
| NM_000458<br>HNF1B 3'end<br>+68625 to +68770    | GGTCTCCTTTTCCCAGAGGT           | GATTGGTTTGTGGGAATTG                |
| NM_001769<br>CD9 intron<br>+29095 to +29233     | GGAATTCCATTGTGGCACTT           | CCTCTGGCCTGCAATAAAAAG              |
| NM_005238<br>ETS1 intron<br>+21360 to +21474    | ACCGGCTGTGACAAGAGAAC           | GCTACTGGGGTGAAGATGGA               |
| NM_175914<br>HNF4 5'end<br>-289 to -433         | CCCCTACTTCTGCATGGT             | AACCCAGAGCCAGGTGTATG               |
| NM_175914<br>HNF4 3'end 1<br>+86913 to +87056   | TTCCATTTCCCAACTTGTGC           | TGCAGACGTGATCTCAAAGC               |
| NM_175914<br>HNF4 3'end 2<br>+101208 to +101345 | CCCAACTCCAAACCAAAAAGA          | TCTAGAGCTGGGCTGTTTGC               |
| NM_001265<br>CDX2 5'end<br>-168 to -268         | AGCCTCCCTCCCCTTTATCT           | CACAGACACCAATGGTTGGA               |
| NM_001265<br>CDX2 3'end<br>+8245 to +8348       | GGGGAAGAACTTGTAATCGC           | ACCCTGTTTGGACAGTGGAG               |
| NM_005588<br>MEP1A 5'end<br>-85 to +3           | ATCTTTGACAACCTTTATTGGCACTA     | AATACCGTTTACACTTTACCTGAC           |

|                                           |                          |                      |
|-------------------------------------------|--------------------------|----------------------|
| NM_001800<br>CDKN2D 5'end<br>-182 to -258 | GGTCCACCGGTTGCCACACTCTGA | CGCGTCGCCGGGGAAACTT  |
| NM_012257<br>HBP1<br>-311 to -225         | GACCAAGGCTTGAGACTACGA    | GGATTGGACTATTGCCGAGA |
| NM_030756<br>TCF7L2<br>-135 to -44        | AGCGCCGCCTTTGAACTG       | GGGGGAAGCCGAAGATACA  |

#### Primers used in promoter and enhancer cloning.

| Refseq (Gene)              | Sense primer (5'-3' direction)           | Antisense primer (5'-3' direction) |
|----------------------------|------------------------------------------|------------------------------------|
| NM_001265<br>(CDX2 5'end)  | gctcgagCAGCGCTTCCCAAACCAAGA              | caagcttGGCTCCTCGCGGCTCTTCT         |
| NM_001265<br>(CDX2 3'end)  | gtaggatccCATCTCAGAGAGCAGCCGA             | gtaggatccGGGTCTGGGTGAGGG           |
| NM_175914<br>(HNF4 5'end)  | atctcgagCTGCCCTCCCTCGGTTTTCCCAC<br>TACTT | ataagcttGTCTTCCCCCAGCCCCACTTACC    |
| NM_175914<br>(HNF4 3'end)  | atcctaggACGTGATATTTTTAGCGAAGTTG          | atggatccCAGGGTTTTATGTGAGGATGAA     |
| NM_138737<br>(HEPH 5'end)  | atactcgagGTGTAGTTATGGCAAACAG             | taaagcttCACTTTTCTCCAGGCAGG         |
| NM_005588<br>(MEP1A 5'end) | ctcgagTTTTTGTCAATGGTATCAGGTGTA           | aagcttCTATGTGGGCAAAAGCAAGGTA       |
| NM_012257<br>(HBP1 5'end)  | gctcgagAGGCCCGGAGGAAAAGAAGAGG            | cagatctTTACCAAACCCGTCGCCATTACC     |

#### Primers used in RT-PCR

| Gene   | Sense primer (5'-3' direction) | Antisense primer (5'-3' direction) |
|--------|--------------------------------|------------------------------------|
| GAPDH  | TGTTGCCATCAATGACCCCTT          | CTCCACGACGTACTIONCAGCG             |
| LGALS8 | CAGGATCGGCCAGAGAAAAT           | TGACCCTGTAAATCCCAGGAG              |
| ETS1   | CTTCGACTCAGAGGACTATCCG         | CCATAGCTGGATTGGTCCACT              |
| CDX1   | GGTGGCAGCGGTAAGACTC            | TGTAACGGCTGTAATGAAACTCC            |
| MEP1A  | TTTACCTTGCTTTTTGCCACACA        | TGTCCCCTTGAAAGAGGTCCA              |
| CD9    | GGATATCCCACAAGGATGAGGT         | GATGGCTTTCAGCGTTTCCC               |
| HNF1B  | AGGCCACAATCTCCTCTCAC           | TTGCTGGGGATTATGGTGGGA              |
| HBP1   | AATGCCTTCATGCTTTTTGCC          | TTGTTGTGAGCCTGAATTGGT              |
| TCF7L2 | GAAACGAATCAAACAGCTCCTC         | TCATCTGGAGATAGGTTCCGGG             |
| CDKN2D | AGTCCAGTCCATGACGCAG            | CATCAGGCACGTTGACATCAG              |
| AXIN2  | CGATCTCCTCTTGGTCTTG            | ACCATTTCGAGTACCACTCC               |
