# Supplementary material
Source: PubMed Central journal article supplement (PMC2919073)
Supplement: supp_M109.089516_jbc.M109.089516-3.pdf [file supp_M109.089516_jbc.M109.089516-3.pdf]

### Supplementary data S3

The results of the CisGenome analysis of the CDX2 ChIP-seq tags.

| chromosome | start     | end       | strand | annotation | refseq acc number |
|------------|-----------|-----------|--------|------------|-------------------|
| chr17      | 46103509  | 46103822  | +      | ABCC3      | NM_020038         |
| chr17      | 46116872  | 46117556  | +      | ABCC3      | NM_020038         |
| chr7       | 72601770  | 72602318  | +      | ABHD11     | NM_148916         |
| chr17      | 960013    | 960412    | +      | ABR        | NM_021962         |
| chr17      | 1074223   | 1074826   | +      | ABR        | NM_021962         |
| chr2       | 111506502 | 111506826 | +      | ACOXL      | NM_018308         |
| chr17      | 77007634  | 77007969  | +      | ACTG1      | NM_001614         |
| chr19      | 43865904  | 43866403  | +      | ACTN4      | NM_004924         |
| chr2       | 114451799 | 114452118 | +      | ACTR3      | NM_005721         |
| chr12      | 50641726  | 50642324  | +      | ACVR1B     | NM_020328         |
| chr10      | 72107392  | 72107726  | +      | ADAMTS14   | NM_080722         |
| chr17      | 15691869  | 15692194  | +      | ADORA2B    | NM_000676         |
| chr12      | 34066373  | 34066705  | +      | ALG10      | NM_032834         |
| chr5       | 34043887  | 34044452  | +      | AMACR      | NM_014324         |
| chr8       | 41805184  | 41805527  | +      | ANK1       | NM_020475         |
| chr5       | 132170861 | 132171226 | +      | ANKRD43    | NM_175873         |
| chr22      | 28126667  | 28126966  | +      | AP1B1      | NM_001127         |
| chr11      | 116184063 | 116184373 | +      | APOA4      | NM_000482         |
| chr17      | 38793714  | 38794019  | +      | ARF4L      | NM_001661         |
| chr3       | 161868019 | 161868373 | +      | ARF7       | NM_025047         |
| chr16      | 24907835  | 24908326  | +      | ARHGAP17   | NM_001006634      |
| chr1       | 17668841  | 17669355  | +      | ARHGEF10L  | NM_001011722      |
| chr11      | 119711907 | 119712429 | +      | ARHGEF12   | NM_015313         |
| chr19      | 7399657   | 7399984   | +      | ARHGEF18   | NM_015318         |
| chr1       | 26702928  | 26703281  | +      | ARID1A     | NM_018450         |
| chr12      | 44407467  | 44407938  | +      | ARID2      | NM_152641         |
| chr19      | 903513    | 904048    | +      | ARID3A     | NM_005224         |
| chr19      | 907288    | 907766    | +      | ARID3A     | NM_005224         |
| chr2       | 38571636  | 38571988  | +      | ARL6IP2    | NM_022374         |
| chr2       | 235053516 | 235053907 | +      | ARL7       | NM_005737         |
| chr10      | 19377318  | 19377770  | +      | ARL8       | NM_178815         |
| chr2       | 218921110 | 218921495 | +      | ARPC2      | NM_005731         |
| chr10      | 73528179  | 73528718  | +      | ASCC1      | NM_015947         |
| chr10      | 123685040 | 123685719 | +      | ATE1       | NM_001001976      |
| chr2       | 216023356 | 216023839 | +      | ATIC       | NM_004044         |
| chr3       | 183961072 | 183961402 | +      | ATP11B     | NM_014616         |
| chr18      | 53615407  | 53615749  | +      | ATP8B1     | NM_005603         |
| chr20      | 49715495  | 49716064  | +      | ATP9A      | NM_006045         |
| chr20      | 49716955  | 49717393  | +      | ATP9A      | NM_006045         |
| chr9       | 91039021  | 91039358  | +      | AUH        | NM_001698         |
| chr17      | 61003406  | 61003868  | +      | AXIN2      | NM_004655         |
| chr22      | 23734145  | 23734640  | +      | bA9F11.1   | NM_001001663      |
| chr17      | 76720229  | 76720622  | +      | BAIAP2     | NM_017451         |
| chr20      | 51965645  | 51965944  | +      | BCAS1      | NM_003657         |
| chr14      | 98852411  | 98852841  | +      | BCL11B     | NM_022898         |
| chr20      | 29755966  | 29756407  | +      | BCL2L1     | NM_001191         |
| chr2       | 111659239 | 111659969 | +      | BCL2L11    | NM_138625         |

|       |           |             |           |              |
|-------|-----------|-------------|-----------|--------------|
| chr11 | 118297154 | 118297456 + | BCL9L     | NM_182557    |
| chr7  | 16660177  | 16660540 +  | BCMP11    | NM_176813    |
| chr16 | 14657747  | 14658310 +  | BFAR      | NM_016561    |
| chr22 | 16777570  | 16777950 +  | BID       | NM_197967    |
| chr2  | 127470557 | 127470985 + | BIN1      | NM_139348    |
| chr20 | 35604167  | 35604473 +  | BLCAP     | NM_006698    |
| chr16 | 29207423  | 29207875 +  | BOLA2     | NM_001031833 |
| chr6  | 33058964  | 33059307 +  | BRD2      | NM_005104    |
| chr10 | 124903469 | 124903885 + | BUB3      | NM_004725    |
| chr10 | 77480698  | 77481296 +  | C10orf11  | NM_032024    |
| chr10 | 115887799 | 115888098 + | C10orf118 | NM_018017    |
| chr10 | 65059249  | 65059610 +  | C10orf74  | NM_001001330 |
| chr10 | 65168254  | 65168601 +  | C10orf74  | NM_001001330 |
| chr11 | 64620056  | 64620364 +  | C11orf2   | NM_013265    |
| chr14 | 91091044  | 91091366 +  | C14orf161 | NM_024764    |
| chr14 | 95070502  | 95071056 +  | C14orf87  | NM_016417    |
| chr17 | 26257188  | 26257645 +  | C17orf42  | NM_024683    |
| chr19 | 703619    | 704105 +    | C19orf21  | NM_173481    |
| chr1  | 240837230 | 240837925 + | C1orf100  | NM_001012970 |
| chr1  | 197597504 | 197597897 + | C1orf106  | NM_018265    |
| chr1  | 44718776  | 44719538 +  | C1orf164  | NM_018150    |
| chr1  | 44722481  | 44722984 +  | C1orf164  | NM_018150    |
| chr1  | 181192962 | 181193286 + | C1orf21   | NM_030806    |
| chr1  | 219205862 | 219206333 + | C1orf80   | NM_022831    |
| chr20 | 30524975  | 30525289 +  | C20orf112 | NM_080616    |
| chr20 | 30526705  | 30527338 +  | C20orf112 | NM_080616    |
| chr20 | 62125730  | 62126610 +  | C20orf14  | NM_012469    |
| chr20 | 62132208  | 62132867 +  | C20orf14  | NM_012469    |
| chr20 | 60438495  | 60439211 +  | C20orf151 | NM_080833    |
| chr20 | 60439325  | 60440073 +  | C20orf151 | NM_080833    |
| chr20 | 48695555  | 48695909 +  | C20orf175 | NM_080829    |
| chr20 | 17650557  | 17651007 +  | C20orf179 | NM_178477    |
| chr20 | 33378273  | 33378859 +  | C20orf44  | NM_018244    |
| chr20 | 42519077  | 42519485 +  | C20orf62  | NM_178476    |
| chr20 | 55965769  | 55966112 +  | C20orf85  | NM_178456    |
| chr20 | 26261389  | 26261691 +  | C20orf91  | NM_182583    |
| chr21 | 41997421  | 41997931 +  | C21orf129 | NM_152506    |
| chr21 | 36496354  | 36496777 +  | C21orf5   | NM_005128    |
| chr2  | 109805705 | 109806024 + | C2orf26   | NM_023016    |
| chr3  | 196361365 | 196361682 + | C3orf21   | NM_152531    |
| chr6  | 150869609 | 150870264 + | C6orf71   | NM_203395    |
| chr8  | 144208632 | 144208973 + | C8orf31   | NM_173687    |
| chr8  | 96148627  | 96149117 +  | C8orf38   | NM_152416    |
| chr17 | 55579749  | 55580501 +  | CA4       | NM_000717    |
| chr17 | 46060328  | 46060732 +  | CACNA1G   | NM_198396    |
| chr2  | 47315224  | 47315570 +  | CALM2     | NM_001743    |
| chr22 | 36222155  | 36222655 +  | CARD10    | NM_014550    |
| chr2  | 113911291 | 113911632 + | CBWD2     | NM_172003    |
| chr11 | 69029011  | 69029337 +  | CCND1     | NM_053056    |
| chr11 | 69163009  | 69163352 +  | CCND1     | NM_053056    |

|       |           |             |          |              |
|-------|-----------|-------------|----------|--------------|
| chr3  | 158360503 | 158361016 + | CCNL1    | NM_020307    |
| chr1  | 116729942 | 116730282 + | CD58     | NM_001779    |
| chr12 | 6208422   | 6209358 +   | CD9      | NM_001769    |
| chr12 | 6214841   | 6215351 +   | CD9      | NM_001769    |
| chr20 | 59186918  | 59187572 +  | CDH4     | NM_001794    |
| chr20 | 31452924  | 31453239 +  | CDK5RAP1 | NM_016408    |
| chr17 | 43398202  | 43399062 +  | CDK5RAP3 | NM_025197    |
| chr5  | 149521676 | 149522308 + | CDX1     | NM_001804    |
| chr5  | 149545051 | 149545408 + | CDX1     | NM_001804    |
| chr13 | 27432791  | 27433221 +  | CDX2     | NM_001265    |
| chr19 | 46930213  | 46930566 +  | CEACAM5  | NM_004363    |
| chr19 | 46970219  | 46970594 +  | CEACAM6  | NM_002483    |
| chr19 | 38476063  | 38476531 +  | CEBPA    | NM_004364    |
| chr22 | 16121910  | 16122235 +  | CECR1    | NM_017424    |
| chr2  | 236768773 | 236769516 + | CENTG2   | NM_014914    |
| chr16 | 54424337  | 54424757 +  | CES1     | NM_001025194 |
| chr2  | 130992341 | 130992871 + | CFC1     | NM_032545    |
| chr2  | 131010602 | 131010915 + | CFC1     | NM_032545    |
| chr16 | 67930899  | 67931238 +  | CGI-37   | NM_016101    |
| chr15 | 55557511  | 55557911 +  | CGNL1    | NM_032866    |
| chr10 | 73457365  | 73457771 +  | CHST3    | NM_004273    |
| chr6  | 139737989 | 139738383 + | CITED2   | NM_006079    |
| chr7  | 72689787  | 72690114 +  | CLDN4    | NM_001305    |
| chr16 | 80039560  | 80039862 +  | CMIP     | NM_198390    |
| chr2  | 96876243  | 96876565 +  | CNNM4    | NM_020184    |
| chr7  | 51448571  | 51449322 +  | COBL     | NM_015198    |
| chr10 | 71328294  | 71328774 +  | COL13A1  | NM_005203    |
| chr2  | 189869473 | 189870014 + | COL5A2   | NM_000393    |
| chr15 | 47234959  | 47235302 +  | COPS2    | NM_004236    |
| chr12 | 6703099   | 6703576 +   | COPS7A   | NM_016319    |
| chr2  | 232476332 | 232476772 + | COPS7B   | NM_022730    |
| chr4  | 84486065  | 84486370 +  | COQ2     | NM_015697    |
| chr8  | 11763579  | 11763947 +  | CTSB     | NM_147780    |
| chr5  | 139002694 | 139003150 + | CXXC5    | NM_016463    |
| chr19 | 46118574  | 46118935 +  | CYP2A7   | NM_000764    |
| chr10 | 73702488  | 73702792 +  | DDIT4    | NM_019058    |
| chr12 | 12884074  | 12884651 +  | DDX47    | NM_016355    |
| chr1  | 12613100  | 12613493 +  | DHRS3    | NM_004753    |
| chr20 | 37112095  | 37112417 +  | DHX35    | NM_021931    |
| chr8  | 13259176  | 13259603 +  | DLC1     | NM_024767    |
| chr10 | 79278720  | 79279274 +  | DLG5     | NM_004747    |
| chr18 | 3592841   | 3593444 +   | DLGAP1   | NM_001003809 |
| chr12 | 32723493  | 32723864 +  | DNM1L    | NM_005690    |
| chr13 | 98226353  | 98226691 +  | DOCK9    | NM_015296    |
| chr2  | 162773641 | 162773973 + | DPP4     | NM_001935    |
| chr5  | 146776844 | 146777400 + | DPYSL3   | NM_001387    |
| chr11 | 117035356 | 117035658 + | DSCAML1  | NM_020693    |
| chr12 | 88253627  | 88253962 +  | DUSP6    | NM_001946    |
| chr12 | 88271825  | 88272174 +  | DUSP6    | NM_001946    |
| chr6  | 12451671  | 12452225 +  | EDN1     | NM_001955    |

|       |           |             |          |           |
|-------|-----------|-------------|----------|-----------|
| chr12 | 92023882  | 92024218 +  | EEA1     | NM_003566 |
| chr1  | 241887341 | 241887939 + | EFCAB2   | NM_032328 |
| chr1  | 241898810 | 241899186 + | EFCAB2   | NM_032328 |
| chr2  | 55981988  | 55982402 +  | EFEMP1   | NM_018894 |
| chr7  | 54888846  | 54889152 +  | EGFR     | NM_201283 |
| chr1  | 198718531 | 198719116 + | ELF3     | NM_004433 |
| chr10 | 119211179 | 119211637 + | EMX2     | NM_004098 |
| chr5  | 73750256  | 73750625 +  | ENC1     | NM_003633 |
| chr9  | 109149176 | 109149691 + | EPB41L4B | NM_018424 |
| chr12 | 48881938  | 48882238 +  | EPLIN    | NM_016357 |
| chr12 | 15660658  | 15661180 +  | EPS8     | NM_004447 |
| chr13 | 102296046 | 102296463 + | ERCC5    | NM_000123 |
| chr11 | 127940862 | 127941535 + | ETS1     | NM_005238 |
| chr17 | 71537017  | 71537475 +  | EVPL     | NM_001988 |
| chr19 | 46595058  | 46595380 +  | EXOSC5   | NM_020158 |
| chr1  | 241324161 | 241324617 + | FAM36A   | NM_198076 |
| chr2  | 16433498  | 16433817 +  | FAM49A   | NM_030797 |
| chr11 | 33780723  | 33781157 +  | FBXO3    | NM_033406 |
| chr11 | 69411983  | 69412316 +  | FGF3     | NM_005247 |
| chr4  | 1764549   | 1764983 +   | FGFR3    | NM_000142 |
| chr5  | 176446784 | 176447142 + | FGFR4    | NM_002011 |
| chr8  | 17809177  | 17809920 +  | FGL1     | NM_004467 |
| chr4  | 159577367 | 159577825 + | FLJ11155 | NM_018342 |
| chr2  | 219761313 | 219761623 + | FLJ12610 | NM_024782 |
| chr2  | 219814840 | 219815420 + | FLJ12610 | NM_024782 |
| chr5  | 37122340  | 37122796 +  | FLJ13231 | NM_023073 |
| chr12 | 108596440 | 108596997 + | FLJ14721 | NM_032829 |
| chr4  | 40358769  | 40359134 +  | FLJ20273 | NM_019027 |
| chr2  | 206604526 | 206604853 + | FLJ20309 | NM_017759 |
| chr2  | 200645664 | 200646259 + | FLJ22555 | NM_024520 |
| chr2  | 11223340  | 11223761 +  | FLJ25143 | NM_182500 |
| chr14 | 98334042  | 98334547 +  | FLJ25773 | NM_182560 |
| chr20 | 30680340  | 30680784 +  | FLJ33706 | NM_182584 |
| chr13 | 43580516  | 43581114 +  | FLJ38725 | NM_153218 |
| chr17 | 76918326  | 76918673 +  | FLJ38792 | NM_178520 |
| chr12 | 115306925 | 115307487 + | FLJ42957 | NM_207436 |
| chr6  | 33665979  | 33666288 +  | FLJ43752 | NM_207497 |
| chr4  | 15836222  | 15836752 +  | FLJ90013 | NM_153365 |
| chr20 | 22441054  | 22441438 +  | FOXA2    | NM_021784 |
| chr3  | 71284726  | 71285139 +  | FOXP1    | NM_032682 |
| chr2  | 208620835 | 208621372 + | FZD5     | NM_003468 |
| chr5  | 160283756 | 160284325 + | GABRB2   | NM_000813 |
| chr1  | 67739269  | 67739804 +  | GADD45A  | NM_001924 |
| chr1  | 67809484  | 67809800 +  | GADD45A  | NM_001924 |
| chr9  | 127232295 | 127232801 + | GARNL3   | NM_032293 |
| chr20 | 60498069  | 60498605 +  | GATA5    | NM_080473 |
| chr18 | 17879330  | 17879734 +  | GATA6    | NM_005257 |
| chr8  | 64084986  | 64085464 +  | GGH      | NM_003878 |
| chr17 | 44403609  | 44403970 +  | GIP      | NM_004123 |
| chr2  | 191554069 | 191554442 + | GLS      | NM_014905 |

|       |           |             |           |              |
|-------|-----------|-------------|-----------|--------------|
| chr19 | 52843329  | 52843750 +  | GLTSCR1   | NM_015711    |
| chr20 | 62071534  | 62071997 +  | GM632     | NM_020713    |
| chr20 | 61729979  | 61730284 +  | GMEB2     | NM_012384    |
| chr1  | 163783442 | 163783744 + | GPA33     | NM_005814    |
| chr6  | 142738971 | 142739367 + | GPR126    | NM_198569    |
| chr2  | 133007701 | 133008044 + | GPR39     | NM_001508    |
| chr16 | 56210873  | 56211264 +  | GPR56     | NM_005682    |
| chr12 | 53039059  | 53039621 +  | GPR84     | NM_020370    |
| chr12 | 12916599  | 12916999 +  | GPRC5A    | NM_003979    |
| chr17 | 18905376  | 18905875 +  | GRAP      | NM_006613    |
| chr17 | 18905962  | 18906428 +  | GRAP      | NM_006613    |
| chr11 | 120050487 | 120050855 + | GRIK4     | NM_014619    |
| chr11 | 67105503  | 67106111 +  | GSTP1     | NM_000852    |
| chr5  | 134704400 | 134704998 + | H2AFY     | NM_138609    |
| chr5  | 153842229 | 153842831 + | HAND1     | NM_004821    |
| chr2  | 196966658 | 196966981 + | HECW2     | NM_020760    |
| chr3  | 195203680 | 195204076 + | HES1      | NM_005524    |
| chr3  | 195273121 | 195273542 + | HES1      | NM_005524    |
| chr3  | 195335096 | 195335936 + | HES1      | NM_005524    |
| chr5  | 130247672 | 130247975 + | HINT1     | NM_005340    |
| chr6  | 26365395  | 26365817 +  | HIST1H2BH | NM_003524    |
| chr1  | 146627148 | 146627626 + | HIST2H2AA | NM_003516    |
| chr1  | 146625659 | 146625971 + | HIST2H3C  | NM_021059    |
| chr10 | 70744769  | 70745148 +  | HK1       | NM_033497    |
| chr10 | 70652363  | 70652923 +  | HKDC1     | NM_025130    |
| chr20 | 42417161  | 42417746 +  | HNF4A     | NM_001030004 |
| chr20 | 42463014  | 42463337 +  | HNF4A     | NM_001030004 |
| chr20 | 42504398  | 42505231 +  | HNF4A     | NM_000457    |
| chr7  | 26927915  | 26928489 +  | HOXA3     | NM_030661    |
| chr7  | 26942519  | 26942956 +  | HOXA4     | NM_002141    |
| chr7  | 26951881  | 26952215 +  | HOXA5     | NM_019102    |
| chr7  | 26952923  | 26953344 +  | HOXA5     | NM_019102    |
| chr17 | 44009580  | 44010443 +  | HOXB4     | NM_024015    |
| chr17 | 44012403  | 44013401 +  | HOXB4     | NM_024015    |
| chr17 | 44022654  | 44022975 +  | HOXB5     | NM_002147    |
| chr17 | 44034845  | 44035157 +  | HOXB6     | NM_018952    |
| chr17 | 44051660  | 44052324 +  | HOXB9     | NM_024017    |
| chr17 | 44057643  | 44058252 +  | HOXB9     | NM_024017    |
| chr17 | 44058731  | 44059296 +  | HOXB9     | NM_024017    |
| chr12 | 52658423  | 52658779 +  | HOXC11    | NM_014212    |
| chr12 | 52658858  | 52659449 +  | HOXC11    | NM_014212    |
| chr12 | 52696635  | 52697103 +  | HOXC4     | NM_014620    |
| chr12 | 52732023  | 52732547 +  | HOXC4     | NM_014620    |
| chr12 | 52713419  | 52714055 +  | HOXC5     | NM_018953    |
| chr12 | 52708725  | 52709415 +  | HOXC6     | NM_004503    |
| chr12 | 52686691  | 52687119 +  | HOXC8     | NM_022658    |
| chr1  | 225667806 | 225668215 + | HRES1     | NM_001007238 |
| chr2  | 20714644  | 20715154 +  | HS1BP3    | NM_022460    |
| chr2  | 43118268  | 43118863 +  | HAAO      | NM_012205    |
| chr20 | 29655603  | 29655946 +  | ID1       | NM_181353    |

|       |           |             |           |              |
|-------|-----------|-------------|-----------|--------------|
| chr20 | 29659942  | 29660299 +  | ID1       | NM_181353    |
| chr20 | 29661926  | 29662320 +  | ID1       | NM_181353    |
| chr2  | 208944215 | 208944639 + | IDH1      | NM_005896    |
| chr1  | 177818442 | 177818820 + | IER5      | NM_016545    |
| chr1  | 116874921 | 116875285 + | IGSF3     | NM_001007237 |
| chr1  | 151203605 | 151204006 + | IL6R      | NM_181359    |
| chr5  | 55265608  | 55266182 +  | IL6ST     | NM_002184    |
| chr1  | 231265543 | 231266075 + | IRF2BP2   | NM_182972    |
| chr16 | 84565579  | 84565881 +  | IRF8      | NM_002163    |
| chr1  | 59062858  | 59063497 +  | JUN       | NM_002228    |
| chr10 | 102815898 | 102816304 + | KAZALD1   | NM_030929    |
| chr10 | 103587446 | 103587853 + | KCNIP2    | NM_173194    |
| chr10 | 78717469  | 78717914 +  | KCNMA1    | NM_002247    |
| chr16 | 70486316  | 70486899 +  | KIAA0174  | NM_014761    |
| chr16 | 52323855  | 52324201 +  | KIAA1005  | NM_015272    |
| chr19 | 40189216  | 40189518 +  | KIAA1533  | NM_020895    |
| chr11 | 105398266 | 105398579 + | KIAA1826  | NM_032424    |
| chr7  | 130138910 | 130139211 + | KLF14     | NM_138693    |
| chr9  | 107455128 | 107455639 + | KLF4      | NM_004235    |
| chr9  | 107661600 | 107661958 + | KLF4      | NM_004235    |
| chr12 | 27885519  | 27885845 +  | KLHDC5    | NM_020782    |
| chr17 | 36954368  | 36954724 +  | KRT19     | NM_002276    |
| chr12 | 51592862  | 51593454 +  | KRT8      | NM_002273    |
| chr12 | 51605174  | 51605496 +  | KRT8      | NM_002273    |
| chr17 | 22886813  | 22887250 +  | KSR       | NM_014238    |
| chr17 | 22903064  | 22903392 +  | KSR       | NM_014238    |
| chr2  | 20173140  | 20173646 +  | LAPTM4A   | NM_014713    |
| chr2  | 169175247 | 169175612 + | LASS6     | NM_203463    |
| chr1  | 221723157 | 221723750 + | LBR       | NM_002296    |
| chr1  | 221913046 | 221913509 + | LBR       | NM_002296    |
| chr12 | 63849315  | 63849834 +  | LEMD3     | NM_014319    |
| chr2  | 187176409 | 187176819 + | LEREPO4   | NM_018471    |
| chr4  | 1826831   | 1827271 +   | LETM1     | NM_012318    |
| chr17 | 74470045  | 74470385 +  | LGALS3BP  | NM_005567    |
| chr1  | 232992376 | 232993022 + | LGALS8    | NM_201545    |
| chr2  | 110102633 | 110102959 + | LIMS3     | NM_033514    |
| chr12 | 123241521 | 123241859 + | LOC144347 | NM_181709    |
| chr5  | 43100633  | 43100975 +  | LOC153684 | NM_194290    |
| chr12 | 31773239  | 31773542 +  | LOC196394 | NM_207337    |
| chr20 | 48416491  | 48416889 +  | LOC284751 | NM_001025463 |
| chr20 | 54587822  | 54588267 +  | LOC388799 | NM_001013646 |
| chr11 | 62202925  | 62203232 +  | LOC51035  | NM_015853    |
| chr8  | 139341465 | 139341820 + | LOC51059  | NM_015912    |
| chr22 | 22287890  | 22288355 +  | LOC51233  | NM_016449    |
| chr7  | 790684    | 791189 +    | LOC90639  | NM_001031617 |
| chr2  | 42102751  | 42103173 +  | LOC91461  | NM_138370    |
| chr2  | 42194589  | 42195219 +  | LOC91461  | NM_138370    |
| chr2  | 42222871  | 42223264 +  | LOC91461  | NM_138370    |
| chr1  | 82754665  | 82754964 +  | LPHN2     | NM_012302    |
| chr11 | 67822029  | 67822671 +  | LRP5      | NM_002335    |

|       |           |             |          |              |
|-------|-----------|-------------|----------|--------------|
| chr12 | 12311286  | 12311759 +  | LRP6     | NM_002336    |
| chr6  | 25744058  | 25744433 +  | LRRC16   | NM_017640    |
| chr17 | 41794842  | 41795148 +  | LRRC37A  | NM_014834    |
| chr2  | 110171075 | 110171377 + | MALL     | NM_005434    |
| chr1  | 25781828  | 25782250 +  | MAN1C1   | NM_020379    |
| chr12 | 12358165  | 12358517 +  | MANSC1   | NM_018050    |
| chr10 | 69748935  | 69749345 +  | MAWBP    | NM_001033083 |
| chr10 | 69761405  | 69761923 +  | MAWBP    | NM_001033083 |
| chr18 | 13869495  | 13869877 +  | MC2R     | NM_000529    |
| chr17 | 17279324  | 17279633 +  | MED9     | NM_018019    |
| chr17 | 17306179  | 17306616 +  | MED9     | NM_018019    |
| chr6  | 46865567  | 46865941 +  | MEP1A    | NM_005588    |
| chr1  | 40115234  | 40115700 +  | MFSD2    | NM_032793    |
| chr7  | 141154427 | 141154924 + | MGAM     | NM_004668    |
| chr2  | 98777329  | 98777877 +  | MGAT4A   | NM_012214    |
| chr17 | 43392724  | 43393163 +  | MGC11242 | NM_024320    |
| chr5  | 72553742  | 72554250 +  | MGC13034 | NM_153217    |
| chr11 | 77383247  | 77383672 +  | MGC16733 | NM_033547    |
| chr11 | 77383675  | 77384001 +  | MGC16733 | NM_033547    |
| chr5  | 144860409 | 144860980 + | MGC21644 | NM_182960    |
| chr5  | 145214277 | 145214871 + | MGC21644 | NM_138492    |
| chr16 | 83898771  | 83899080 +  | MGC22001 | NM_153238    |
| chr12 | 31414930  | 31415501 +  | MGC24039 | NM_144973    |
| chr17 | 16282478  | 16282793 +  | MGC40157 | NM_152350    |
| chr17 | 16282803  | 16283110 +  | MGC40157 | NM_152350    |
| chr6  | 43992886  | 43993484 +  | MGC45491 | NM_153246    |
| chr6  | 44002352  | 44003097 +  | MGC45491 | NM_153246    |
| chr2  | 87578403  | 87578869 +  | MGC4677  | NM_052871    |
| chr2  | 87623115  | 87623716 +  | MGC4677  | NM_052871    |
| chr12 | 46634456  | 46634975 +  | MGC5576  | NM_024056    |
| chr2  | 122181103 | 122181693 + | MKI67IP  | NM_032390    |
| chr12 | 6733168   | 6733512 +   | MLF2     | NM_005439    |
| chr12 | 29212146  | 29212539 +  | MLSTD1   | NM_018099    |
| chr22 | 25933191  | 25933580 +  | MN1      | NM_002430    |
| chr22 | 26353326  | 26353796 +  | MN1      | NM_002430    |
| chr11 | 75123465  | 75123926 +  | MOGAT2   | NM_025098    |
| chr2  | 218985222 | 218985575 + | MR-1     | NM_015488    |
| chr11 | 1967617   | 1968142 +   | MRPL23   | NM_021134    |
| chr3  | 132704321 | 132704664 + | MRPL3    | NM_007208    |
| chr11 | 73168359  | 73168704 +  | MRPL48   | NM_001030046 |
| chr17 | 52857226  | 52857629 +  | MSI2     | NM_170721    |
| chr17 | 52993645  | 52994247 +  | MSI2     | NM_170721    |
| chr3  | 126204872 | 126205470 + | MUC13    | NM_033049    |
| chr11 | 1050854   | 1051353 +   | MUC2     | NM_002457    |
| chr8  | 128482096 | 128482826 + | MYC      | NM_002467    |
| chr8  | 128651615 | 128652213 + | MYC      | NM_002467    |
| chr2  | 16193517  | 16194240 +  | MYCN     | NM_005378    |
| chr11 | 68798525  | 68798985 +  | MYEOV    | NM_138768    |
| chr11 | 68812071  | 68812846 +  | MYEOV    | NM_138768    |
| chr7  | 100823317 | 100823682 + | MYLC2PL  | NM_138403    |

|       |           |             |         |              |
|-------|-----------|-------------|---------|--------------|
| chr7  | 100954359 | 100954668 + | MYLC2PL | NM_138403    |
| chr2  | 192169579 | 192170004 + | MYO1B   | NM_012223    |
| chr20 | 62331311  | 62331617 +  | MYT1    | NM_004535    |
| chr2  | 191268993 | 191269304 + | NAB1    | NM_005966    |
| chr2  | 73781103  | 73781461 +  | NAT8    | NM_003960    |
| chr11 | 19980757  | 19981301 +  | NAV2    | NM_182964    |
| chr21 | 22668763  | 22669118 +  | NCAM2   | NM_004540    |
| chr17 | 44304049  | 44304527 +  | NDP52   | NM_005831    |
| chr17 | 44305526  | 44305904 +  | NDP52   | NM_005831    |
| chr6  | 11366557  | 11367104 +  | NEDD9   | NM_006403    |
| chr10 | 105257377 | 105258005 + | NEURL   | NM_004210    |
| chr20 | 49433037  | 49433343 +  | NFATC2  | NM_173091    |
| chr2  | 177953525 | 177954109 + | NFE2L2  | NM_006164    |
| chr5  | 150143156 | 150143752 + | NID67   | NM_032947    |
| chr5  | 150169034 | 150169567 + | NID67   | NM_032947    |
| chr1  | 179977143 | 179977695 + | NMNAT2  | NM_170706    |
| chr5  | 177513439 | 177513752 + | NOLA2   | NM_017838    |
| chr17 | 23148688  | 23149320 +  | NOS2A   | NM_000625    |
| chr1  | 120286882 | 120287317 + | NOTCH2  | NM_024408    |
| chr1  | 120324315 | 120324854 + | NOTCH2  | NM_024408    |
| chr1  | 120386358 | 120386679 + | NOTCH2  | NM_024408    |
| chr15 | 94467202  | 94467570 +  | NR2F2   | NM_021005    |
| chr5  | 142778219 | 142778569 + | NR3C1   | NM_001018074 |
| chr9  | 124611407 | 124611786 + | NR6A1   | NM_001489    |
| chr16 | 27192682  | 27193114 +  | NSMCE1  | NM_145080    |
| chr3  | 96542710  | 96543268 +  | NSUN3   | NM_022072    |
| chr12 | 5476939   | 5477432 +   | NTF3    | NM_002527    |
| chr1  | 202007750 | 202008182 + | NUAK2   | NM_030952    |
| chr11 | 132605453 | 132606068 + | OPCML   | NM_001012393 |
| chr15 | 20042351  | 20042743 +  | OR4N4   | NM_001005241 |
| chr15 | 63124448  | 63124757 +  | OSTbeta | NM_178859    |
| chr11 | 72583368  | 72583670 +  | P2RY2   | NM_002564    |
| chr11 | 76860420  | 76860895 +  | PAK1    | NM_002576    |
| chr12 | 3994761   | 3995061 +   | PARP11  | NM_020367    |
| chr20 | 55569091  | 55569569 +  | PCK1    | NM_002591    |
| chr1  | 142478389 | 142478947 + | PDE4DIP | NM_001002810 |
| chr5  | 149305774 | 149306255 + | PDE6A   | NM_000440    |
| chr21 | 43014484  | 43015031 +  | PDE9A   | NM_001001578 |
| chr1  | 143212468 | 143212803 + | PDZK1   | NM_002614    |
| chr6  | 143813502 | 143813820 + | PEX3    | NM_003630    |
| chr8  | 97952934  | 97953233 +  | PGCP    | NM_016134    |
| chr6  | 12637085  | 12637666 +  | PHACTR1 | NM_030948    |
| chr6  | 144015838 | 144016193 + | PHACTR2 | NM_014721    |
| chr17 | 44840387  | 44840824 +  | PHB     | NM_002634    |
| chr17 | 44847247  | 44847550 +  | PHB     | NM_002634    |
| chr13 | 98887092  | 98887404 +  | PHGDHL1 | NM_177967    |
| chr10 | 60503104  | 60503619 +  | PHYHIPL | NM_032439    |
| chr1  | 203503326 | 203503913 + | PIGR    | NM_002644    |
| chr5  | 67211180  | 67211668 +  | PIK3R1  | NM_181523    |
| chr6  | 37179054  | 37179383 +  | PIM1    | NM_002648    |

|       |           |             |          |              |
|-------|-----------|-------------|----------|--------------|
| chr6  | 37180479  | 37180787 +  | PIM1     | NM_002648    |
| chr5  | 134503087 | 134503515 + | PITX1    | NM_002653    |
| chr20 | 42671931  | 42672283 +  | PKIG     | NM_007066    |
| chr12 | 32942900  | 32943328 +  | PKP2     | NM_001005242 |
| chr15 | 40218320  | 40218862 +  | PLA2G4F  | NM_213600    |
| chr2  | 28643011  | 28643386 +  | PLB1     | NM_153021    |
| chr20 | 39211618  | 39212014 +  | PLCG1    | NM_002660    |
| chr1  | 238700594 | 238700989 + | PLD5     | NM_152666    |
| chr11 | 73017414  | 73017778 +  | PLEKHB1  | NM_021200    |
| chr11 | 73043348  | 73043670 +  | PLEKHB1  | NM_021200    |
| chr2  | 55851395  | 55852024 +  | PNPT1    | NM_033109    |
| chr20 | 30279131  | 30279928 +  | POFUT1   | NM_015352    |
| chr11 | 110710476 | 110711176 + | POU2AF1  | NM_006235    |
| chr11 | 110736045 | 110736477 + | POU2AF1  | NM_006235    |
| chr5  | 149062645 | 149062992 + | PPARGC1B | NM_133263    |
| chr6  | 150614712 | 150615606 + | PPP1R14C | NM_030949    |
| chr10 | 46495021  | 46495828 +  | PPYR1    | NM_005972    |
| chr10 | 46572606  | 46573020 +  | PPYR1    | NM_005972    |
| chr1  | 3189897   | 3190432 +   | PRDM16   | NM_022114    |
| chr1  | 3263261   | 3263625 +   | PRDM16   | NM_022114    |
| chr1  | 170175931 | 170176361 + | PRDX6    | NM_004905    |
| chr20 | 45418659  | 45418976 +  | PRKCBP1  | NM_012408    |
| chr20 | 45446132  | 45446547 +  | PRKCBP1  | NM_012408    |
| chr1  | 44402006  | 44402604 +  | PRNP     | NM_024066    |
| chr22 | 17287674  | 17288046 +  | PRODH    | NM_016335    |
| chr8  | 27279090  | 27279679 +  | PTK2B    | NM_173175    |
| chr6  | 64219993  | 64220361 +  | PTP4A1   | NM_003463    |
| chr3  | 124786487 | 124787020 + | PTPLB    | NM_198402    |
| chr20 | 48473044  | 48473470 +  | PTPN1    | NM_002827    |
| chr2  | 130879280 | 130879580 + | PTPN18   | NM_014369    |
| chr7  | 157724912 | 157725212 + | PTPRN2   | NM_002847    |
| chr11 | 119114773 | 119115485 + | PVRL1    | NM_203286    |
| chr11 | 119240019 | 119240535 + | PVRL1    | NM_203286    |
| chr1  | 157866287 | 157866700 + | PVRL4    | NM_030916    |
| chr20 | 42414018  | 42414432 +  | R3HDML   | NM_178491    |
| chr11 | 82481444  | 82481815 +  | RAB30    | NM_014488    |
| chr12 | 1508107   | 1508522 +   | RAB6IP2  | NM_015064    |
| chr10 | 80488930  | 80489287 +  | RAI17    | NM_020338    |
| chr2  | 120719151 | 120719744 + | RALB     | NM_002881    |
| chr2  | 204269219 | 204269704 + | RAPH1    | NM_025252    |
| chr18 | 18517358  | 18517692 +  | RBBP8    | NM_002894    |
| chr20 | 35157527  | 35157832 +  | RBL1     | NM_183404    |
| chr1  | 231416266 | 231416606 + | RBM34    | NM_015014    |
| chr8  | 28803224  | 28803594 +  | RC74     | NM_018250    |
| chr15 | 54325505  | 54325844 +  | RFXDC2   | NM_022841    |
| chr1  | 237272865 | 237273454 + | RGS7     | NM_002924    |
| chr1  | 225303452 | 225303828 + | RHOU     | NM_021205    |
| chr19 | 38223977  | 38224299 +  | RHPN2    | NM_033103    |
| chr20 | 19813427  | 19813812 +  | RIN2     | NM_018993    |
| chr14 | 92106871  | 92107178 +  | RIN3     | NM_024832    |

|       |           |             |          |              |
|-------|-----------|-------------|----------|--------------|
| chr12 | 47563875  | 47564212 +  | RND1     | NM_014470    |
| chr7  | 155958585 | 155959277 + | RNF32    | NM_030936    |
| chr3  | 142940224 | 142940526 + | RNF7     | NM_183063    |
| chr20 | 33793498  | 33794057 +  | RNPC2    | NM_184237    |
| chr5  | 10560571  | 10560880 +  | ROPN1L   | NM_031916    |
| chr15 | 67633483  | 67634234 +  | RPLP1    | NM_001003    |
| chr15 | 67673857  | 67674398 +  | RPLP1    | NM_001003    |
| chr12 | 54721719  | 54722093 +  | RPS26    | NM_001029    |
| chr14 | 48344115  | 48344715 +  | RPS29    | NM_001030001 |
| chr12 | 121377790 | 121378244 + | RSN      | NM_002956    |
| chr22 | 18565667  | 18566064 +  | RTN4R    | NM_023004    |
| chr20 | 49910270  | 49910763 +  | SALL4    | NM_020436    |
| chr20 | 49921781  | 49922374 +  | SALL4    | NM_020436    |
| chr5  | 133996174 | 133996488 + | SAR1B    | NM_016103    |
| chr4  | 71918835  | 71919229 +  | SAS10    | NM_020368    |
| chr2  | 199658589 | 199659290 + | SATB2    | NM_015265    |
| chr17 | 43676330  | 43677216 +  | SCAP1    | NM_003726    |
| chr12 | 123837197 | 123837589 + | SCARB1   | NM_005505    |
| chr12 | 123894495 | 123894983 + | SCARB1   | NM_005505    |
| chr11 | 57727     | 58213 +     | SCGB1C1  | NM_145651    |
| chr11 | 66456     | 66807 +     | SCGB1C1  | NM_145651    |
| chr11 | 170092    | 170401 +    | SCGB1C1  | NM_145651    |
| chr20 | 43405820  | 43406128 +  | SDC4     | NM_002999    |
| chr10 | 94787776  | 94788075 +  | SEC15L1  | NM_019053    |
| chr6  | 134630549 | 134631190 + | SGK      | NM_005627    |
| chr10 | 105543744 | 105544515 + | SH3MD1   | NM_014631    |
| chr7  | 155100033 | 155100463 + | SHH      | NM_000193    |
| chr19 | 43125822  | 43126356 +  | SIPA1L3  | NM_015073    |
| chr1  | 156753737 | 156754197 + | SLAMF9   | NM_033438    |
| chr5  | 127213381 | 127213988 + | SLC12A2  | NM_001046    |
| chr10 | 69957057  | 69957600 +  | SLC25A16 | NM_152707    |
| chr3  | 142143046 | 142143373 + | SLC25A36 | NM_018155    |
| chr20 | 36748013  | 36748369 +  | SLC32A1  | NM_080552    |
| chr12 | 67426013  | 67426376 +  | SLC35E3  | NM_018656    |
| chr17 | 67973293  | 67973652 +  | SLC39A11 | NM_139177    |
| chr17 | 68026517  | 68027134 +  | SLC39A11 | NM_139177    |
| chr17 | 68191529  | 68191892 +  | SLC39A11 | NM_139177    |
| chr17 | 68191934  | 68192349 +  | SLC39A11 | NM_139177    |
| chr17 | 1442973   | 1443719 +   | SLC43A2  | NM_152346    |
| chr4  | 19107606  | 19107974 +  | SLIT2    | NM_004787    |
| chr5  | 68891623  | 68891985 +  | SMA3     | NM_006780    |
| chr15 | 65011525  | 65011880 +  | SMAD3    | NM_005902    |
| chr10 | 112077112 | 112077488 + | SMNDC1   | NM_005871    |
| chr1  | 242098857 | 242099158 + | SMYD3    | NM_022743    |
| chr15 | 40570526  | 40570854 +  | SNAP23   | NM_003825    |
| chr17 | 43539915  | 43540336 +  | SNX11    | NM_013323    |
| chr6  | 21916865  | 21917367 +  | SOX4     | NM_003107    |
| chr17 | 43316132  | 43316990 +  | SP2      | NM_003110    |
| chr17 | 43317322  | 43317707 +  | SP2      | NM_003110    |
| chr17 | 46354838  | 46355499 +  | SPAG9    | NM_172345    |

|       |           |             |         |              |
|-------|-----------|-------------|---------|--------------|
| chr17 | 46376909  | 46377326 +  | SPAG9   | NM_172345    |
| chr5  | 151067920 | 151068395 + | SPARC   | NM_003118    |
| chr1  | 15906181  | 15906523 +  | SPEN    | NM_015001    |
| chr15 | 38926921  | 38927324 +  | SPINT1  | NM_001032367 |
| chr11 | 13970291  | 13970593 +  | SPON1   | NM_006108    |
| chr4  | 124723060 | 124723493 + | SPRY1   | NM_005841    |
| chr4  | 124757434 | 124758103 + | SPRY1   | NM_005841    |
| chr13 | 79605157  | 79605506 +  | SPRY2   | NM_005842    |
| chr2  | 54713064  | 54713380 +  | SPTBN1  | NM_178313    |
| chr20 | 35406317  | 35406617 +  | SRC     | NM_005417    |
| chr7  | 87501114  | 87501422 +  | SRI     | NM_198901    |
| chr11 | 94465711  | 94466107 +  | SRP46   | NM_032102    |
| chr1  | 222272054 | 222272395 + | SRP9    | NM_003133    |
| chr11 | 129556529 | 129556841 + | ST14    | NM_021978    |
| chr3  | 137953759 | 137954152 + | STAG1   | NM_005862    |
| chr3  | 153172241 | 153172659 + | SUCNR1  | NM_033050    |
| chr19 | 53748838  | 53749295 +  | SULT2B1 | NM_177973    |
| chr17 | 45319621  | 45319943 +  | TAC4    | NM_170685    |
| chr2  | 47448814  | 47449405 +  | TACSTD1 | NM_002354    |
| chr2  | 47507649  | 47508118 +  | TACSTD1 | NM_002354    |
| chr17 | 75504517  | 75504845 +  | TBC1D16 | NM_019020    |
| chr3  | 178560431 | 178560859 + | TBL1XR1 | NM_024665    |
| chr3  | 179024514 | 179024932 + | TBL1XR1 | NM_024665    |
| chr5  | 145788284 | 145788837 + | TCERG1  | NM_006706    |
| chr15 | 55391722  | 55392302 +  | TCF12   | NM_207040    |
| chr17 | 33110307  | 33110800 +  | TCF2    | NM_000458    |
| chr17 | 33144290  | 33144802 +  | TCF2    | NM_000458    |
| chr22 | 41003851  | 41004289 +  | TCF20   | NM_181492    |
| chr5  | 1304602   | 1305403 +   | TERT    | NM_003219    |
| chr21 | 42626145  | 42626506 +  | TFF2    | NM_005423    |
| chr20 | 36205096  | 36205603 +  | TGM2    | NM_198951    |
| chr11 | 2181810   | 2182140 +   | TH      | NM_000360    |
| chr11 | 2188671   | 2189434 +   | TH      | NM_000360    |
| chr8  | 42817545  | 42817876 +  | THAP1   | NM_018105    |
| chr12 | 114374993 | 114375588 + | THRAP2  | NM_015335    |
| chr15 | 28005316  | 28005687 +  | TJP1    | NM_003257    |
| chr10 | 102862688 | 102863192 + | TLX1    | NM_005521    |
| chr16 | 18908164  | 18908593 +  | TMC7    | NM_024847    |
| chr3  | 131109941 | 131110257 + | TMCC1   | NM_001017395 |
| chr12 | 99948206  | 99948818 +  | TMEM16D | NM_178826    |
| chr2  | 119899538 | 119900011 + | TMEM37  | NM_183240    |
| chr3  | 186699184 | 186699522 + | TMEM41A | NM_080652    |
| chr14 | 19999641  | 20000035 +  | TMEM55B | NM_144568    |
| chr7  | 77072318  | 77072907 +  | TMEM60  | NM_032936    |
| chr20 | 55701299  | 55701991 +  | TMEM60  | NM_032936    |
| chr20 | 55701299  | 55701991 +  | TMEMPAI | NM_020182    |
| chr11 | 117452726 | 117453035 + | TMPRSS4 | NM_183247    |
| chr6  | 138070807 | 138071114 + | TNFAIP3 | NM_006290    |
| chr17 | 46298479  | 46298960 +  | TOB1    | NM_005749    |
| chr17 | 46300023  | 46300463 +  | TOB1    | NM_005749    |
| chr17 | 46325665  | 46325971 +  | TOB1    | NM_005749    |

|       |           |             |         |              |
|-------|-----------|-------------|---------|--------------|
| chr17 | 46337153  | 46337519 +  | TOB1    | NM_005749    |
| chr7  | 22599303  | 22599658 +  | TOMM7   | NM_019059    |
| chr21 | 9799587   | 9799887 +   | TPTE    | NM_199261    |
| chr4  | 154483649 | 154484064 + | TRIM2   | NM_015271    |
| chr5  | 14185044  | 14185501 +  | TRIO    | NM_007118    |
| chr5  | 14227484  | 14227910 +  | TRIO    | NM_007118    |
| chr6  | 43343389  | 43343827 +  | TTBK1   | NM_032538    |
| chr5  | 159424782 | 159425102 + | TTC1    | NM_003314    |
| chr10 | 132294021 | 132294569 + | TXNL2   | NM_006541    |
| chr6  | 132890612 | 132890955 + | TAAR9   | NM_175057    |
| chr1  | 11334119  | 11334441 +  | UBIAD1  | NM_013319    |
| chr6  | 42639408  | 42639777 +  | UBR2    | NM_015255    |
| chr10 | 72665888  | 72666208 +  | UNC5B   | NM_170744    |
| chr7  | 618157    | 618569 +    | UNC84A  | NM_025154    |
| chr22 | 43989864  | 43990429 +  | UPK3A   | NM_006953    |
| chr13 | 26421947  | 26422483 +  | USP12   | NM_182488    |
| chr13 | 26423798  | 26424406 +  | USP12   | NM_182488    |
| chr13 | 26428510  | 26429332 +  | USP12   | NM_182488    |
| chr13 | 26434038  | 26434523 +  | USP12   | NM_182488    |
| chr13 | 26440702  | 26441610 +  | USP12   | NM_182488    |
| chr13 | 26450580  | 26451080 +  | USP12   | NM_182488    |
| chr13 | 26455395  | 26455764 +  | USP12   | NM_182488    |
| chr15 | 61553358  | 61553842 +  | USP3    | NM_006537    |
| chr15 | 61582498  | 61582891 +  | USP3    | NM_006537    |
| chr6  | 149548680 | 149549086 + | UST     | NM_005715    |
| chr9  | 133782894 | 133783272 + | VAV2    | NM_003371    |
| chr9  | 133866680 | 133867078 + | VAV2    | NM_003371    |
| chr5  | 133381914 | 133382444 + | VDAC1   | NM_003374    |
| chr6  | 43880040  | 43880564 +  | VEGF    | NM_001033756 |
| chr12 | 6068264   | 6068903 +   | VWF     | NM_000552    |
| chr7  | 43831940  | 43832313 +  | WBSCR19 | NM_175064    |
| chr20 | 42755001  | 42755370 +  | WISP2   | NM_003881    |
| chr16 | 76888387  | 76888868 +  | WVVOX   | NM_018560    |
| chr11 | 101487330 | 101487844 + | YAP1    | NM_006106    |
| chr2  | 43300148  | 43301374 +  | ZFP36L2 | NM_006887    |
| chr2  | 43301451  | 43302270 +  | ZFP36L2 | NM_006887    |
| chr2  | 43325684  | 43326061 +  | ZFP36L2 | NM_006887    |
| chr2  | 43332882  | 43333276 +  | ZFP36L2 | NM_006887    |
| chr20 | 49998145  | 49998444 +  | ZFP64   | NM_199427    |
| chr20 | 50081825  | 50082396 +  | ZFP64   | NM_199427    |
| chr20 | 50589840  | 50590250 +  | ZFP64   | NM_018197    |
| chr7  | 99246080  | 99246466 +  | ZKSCAN1 | NM_003439    |
| chr19 | 49360794  | 49361122 +  | ZNF226  | NM_001032374 |
| chr10 | 38305387  | 38305706 +  | ZNF25   | NM_145011    |
| chr1  | 33568587  | 33568886 +  | ZNF31   | NM_145238    |
| chr5  | 123992640 | 123993037 + | ZNF608  | NM_020747    |
| chr5  | 124025635 | 124026455 + | ZNF608  | NM_020747    |
| chr5  | 124390864 | 124391350 + | ZNF608  | NM_020747    |
| chr8  | 37279041  | 37279724 +  | ZNF703  | NM_025069    |
| chr8  | 37336345  | 37336718 +  | ZNF703  | NM_025069    |

|       |           |             |          |           |
|-------|-----------|-------------|----------|-----------|
| chr8  | 37337173  | 37337581 +  | ZNF703   | NM_025069 |
| chr8  | 37524488  | 37524997 +  | ZNF703   | NM_025069 |
| chr8  | 37529470  | 37529862 +  | ZNF703   | NM_025069 |
| chr8  | 37571208  | 37571692 +  | ZNF703   | NM_025069 |
| chr8  | 37575113  | 37575632 +  | ZNF703   | NM_025069 |
| chr2  | 187648947 | 187649246 + | ZSWIM2   | NM_182521 |
| chr11 | 105584755 | 105585284 + | AASDHPPT | NM_015423 |
