# Supplementary material
Source: PubMed Central journal article supplement (PMC2919073)
Supplement: supp_M109.089516_jbc.M109.089516-4.pdf [file supp_M109.089516_jbc.M109.089516-4.pdf]

A

Genomic position of CDX2 ChIP-seq peaks

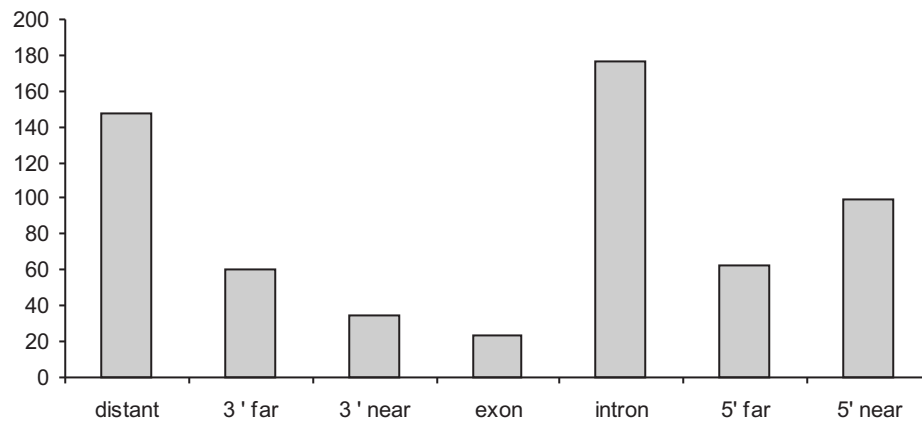

B

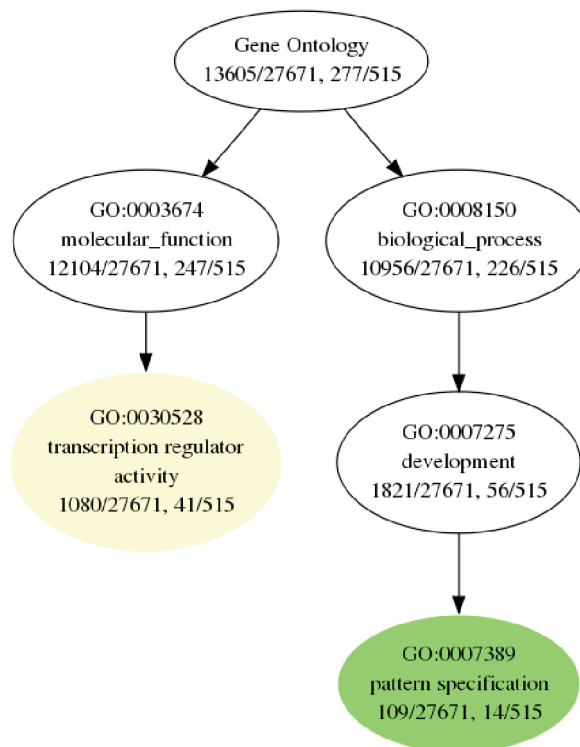**Supplementary data S4.**

Analysis of the 604 CDX2 ChIP-seq peaks with PinkThing

(A) PinkThing predicted genomic position of CDX2 ChIP-seq peaks. Binding sites were divided into categories based on their position relative to the nearest gene: Distant (>25kb), 3'far (5-25bp), 3'near (0-5kb), exon, intron, 5'far (5-25kb), 5'near (0-5kb). (B) PinkThing prediction of overrepresented GO-categories.
